# Supplementary material for: Serum High-Mobility Group Box 1 and Heme Oxygenase-1 as Biomarkers in COVID-19 Patients at Hospital Admission
Source: MDPI journal article supplement (doi:10.3390/ijms241713164), 2023-08-24
Supplement: s1 [file s1]

**Table S1.** Examined parameters in mild and moderate COVID-19 patients

|               | Mild (n=96)           | Moderate (n=64)        | p value             |
|---------------|-----------------------|------------------------|---------------------|
| HMGB1 (pg/ml) | 496.1 (344.3-739.8)   | 470.3 (184.6-634.3)    | 0.202 <sup>a</sup>  |
| HO-1 (pg/ml)  | 1376.3 (908.9-2152.0) | 1794.2 (1059.4-3063.9) | 0.063 <sup>a</sup>  |
| Hp            | 2.91±1.01             | 2.94±1.28              | 0.873 <sup>b</sup>  |
| Fe            | 15.64±7.08            | 15.21±8.89             | 0.744 <sup>b</sup>  |
| Ferritin      | 395 (194.5-751.6)     | 840.1 (424.6-1675.6)   | <0.001 <sup>a</sup> |
| TB            | 9.95 (7.10-12.80)     | 9.8 (7.5-15.5)         | 0.346 <sup>a</sup>  |
| PAB (HKU)     | 6.89±1.49             | 6.97±1.98              | 0.782 <sup>b</sup>  |
| AOPP (μmol/l) | 5.11±1.57             | 4.38±1.41              | 0.003 <sup>b</sup>  |
| MDA (μmol/l)  | 0.139 (0.120-0.181)   | 0.129 (0.110-0.165)    | 0.018 <sup>a</sup>  |
| HNE (μg/ml)   | 0.145 (0.090-0.184)   | 0.114 (0.046-0.172)    | 0.044 <sup>a</sup>  |
| GSH/GSSG      | 0.855±0.268           | 0.948±0.331            | 0.073 <sup>b</sup>  |
| PC/LPC        | 0.671±0.173           | 0.658±0.219            | 0.696 <sup>b</sup>  |

<sup>a</sup>Mann-Whitney U test; <sup>b</sup>t test; descriptive statistics presented as median (25-75th percentile) or mean±sd

**Table S2.** Logistic regression analysis in mild and moderate COVID-19 patients

| MODEL        | Enter               |         | Backward             |         |
|--------------|---------------------|---------|----------------------|---------|
|              | OR (95% CI)         | p value | OR (95% CI)          | p value |
| Log Ferritin | 3.596 (1.359-9.514) | 0.010   | 4.437 (1.724-11.424) | 0.002   |
| Log HO-1     | 2.123 (0.594-7.591) | 0.247   |                      |         |
| AOPP         | 0.865 (0.635-1.179) | 0.359   |                      |         |
| HNE          | 0.010 (0.001-3.848) | 0.129   |                      |         |
| Log MDA      | 0.100 (0.003-3.534) | 0.206   | 0.004 (0.001-0.975)  | 0.049   |
| GSH/GSSG     | 1.920 (0.450-8.198) | 0.378   | 0.040 (0.002-0.767)  | 0.033   |

<sup>a</sup>Backward method was performed with 0.10 significance as a cut off for variable elimination
